# Supplementary material for: Observation of reaction intermediates and kinetic mistakes in a remarkably slow self-assembly reaction
Source: Royal Society of Chemistry journal article supplement (doi:10.1039/b914750k), 2009-01-01
Supplement: b914750k.pdf [file b914750k.pdf]

## Insight into Self-Assembly: Reaction Intermediates and Kinetic Mistakes Observed in a Remarkably Slow Reaction

Virginia M. Cangelosi, Timothy G. Carter, Lev N. Zakharov, and Darren W. Johnson\*

Department of Chemistry and Materials Science Institute, University of Oregon, Eugene, OR 97403-1253, and the Oregon Nanoscience and Microtechnologies Institute (ONAMI).

dwj@uoregon.edu

### Supporting Information

#### Experimental:

*General Procedures.* Commercially available reagents were used as received. All ligands were prepared following literature procedures.<sup>1</sup> *Caution: Arsenic compounds are hazardous and should be handled with care!*

*NMR Experiments.* <sup>1</sup>H NMR spectra were measured using a Varian INOVA-300 spectrometer. Spectra were referenced using the residual CHCl<sub>3</sub> solvent resonance as an internal standard.

*As<sub>2</sub>L<sup>a</sup><sub>2</sub>Cl<sub>2</sub> (4<sup>a</sup>).* 1,4-bis(mercaptomethyl)benzene (H<sub>2</sub>L<sup>a</sup>, 16.1 mg, 94.9 μmol) was dissolved in 2.0 mL CDCl<sub>3</sub> in a scintillation vial. In a separate vial, AsCl<sub>3</sub> (94.8 μmol, 8.09 μL) was dissolved in 2.0 mL CDCl<sub>3</sub>. The AsCl<sub>3</sub> solution was added to the solution containing ligand and mixed well (T=0). An aliquot was transferred to an NMR tube and monitored by <sup>1</sup>H NMR.

*As<sub>2</sub>L<sup>b</sup><sub>2</sub>Cl<sub>2</sub> (4<sup>b</sup>).* 1,4-bis(mercaptomethyl)durene (H<sub>2</sub>L<sup>b</sup>, 14.0 mg, 61.8 μmol) was dissolved in 4.0 mL CDCl<sub>3</sub> in a scintillation vial. AsCl<sub>3</sub> (61.8 μmol, 5.28 μL) was added and the solution was mixed well (T=0). An aliquot was transferred to an NMR tube and monitored by <sup>1</sup>H NMR (Figure S1). Colorless X-ray quality crystals were grown by the slow diffusion of pentane into a CHCl<sub>3</sub> solution of As<sub>2</sub>L<sup>b</sup><sub>2</sub>Cl<sub>2</sub>. Crystallographic Data: C<sub>24</sub>H<sub>32</sub>As<sub>2</sub>Cl<sub>2</sub>S<sub>4</sub>, M = 669.48, 0.16 x 0.14 x 0.10 mm, T = 293 K, Triclinic, space group P-1, *a* = 8.4667(7) Å, *b* = 10.6932(9) Å, *c* = 17.0485(15) Å, *α* = 87.852(2)°, *β* = 77.066(2)°, *γ* = 68.0790(10)°, *V* = 1393.8(2) Å<sup>3</sup>, *Z* = 2, *D<sub>c</sub>* = 1.595 Mg/m<sup>3</sup>, *μ* = 2.901 mm<sup>-1</sup>, *F*(000) = 680, 2 $\theta$ <sub>max</sub> = 27.00°, 15620 reflections (-10 ≤ *h* ≤ 10, -13 ≤ *k* ≤ 13, -21 ≤ *l* ≤ 21), 6027 independent reflections [*R*<sub>int</sub> = 0.0306], *R*1 = 0.0624, *wR*2 = 0.1638 and *GOF* = 1.033 for 6027 reflections (298 parameters) with *I*>2σ(*I*), *R*1 = 0.0945, *wR*2 = 0.1892 and *GOF* = 1.033 for all reflections, max/min residual electron density +1.741/-0.704 eÅ<sup>-3</sup>, CCDC: 741267.

$As_4L^cCl_4$  (**3<sup>c</sup>**).  $AsCl_3$  (3.44  $\mu$ L, 0.0404 mmol) was added slowly to a solution of 2,5-bis(mercaptomethyl)-1,4-dimethoxybenzene ( $H_2L^c$ ) (9.30 mg, 0.0404 mmol) in  $CHCl_3$  (4 mL) and mixed well. An aliquot of the solution was transferred into a vial and layered with pentane. Slow diffusion of pentane into this solution yielded colorless crystals after one week. Crystallographic Data:  $C_{10}H_{12}As_2Cl_4O_2S$ ,  $M = 519.96$ ,  $0.27 \times 0.22 \times 0.14$  mm,  $T = 173(2)$  K, monoclinic, space group  $P2_1/c$ ,  $a = 8.1642(8)$  Å,  $b = 11.7354(12)$  Å,  $c = 9.2996(9)$  Å,  $\beta = 106.451(2)^\circ$ ,  $V = 854.52(15)$  Å<sup>3</sup>,  $Z = 2$ ,  $D_c = 2.021$  Mg/m<sup>3</sup>,  $\mu = 4.775$  mm<sup>-1</sup>,  $F(000) = 508$ ,  $2\theta_{max} = 28.19^\circ$ , 9618 reflections ( $-10 \leq h \leq 10$ ,  $-13 \leq k \leq 13$ ,  $-21 \leq l \leq 21$ ), 2030 independent reflections [ $R_{int} = 0.0194$ ],  $R1 = 0.0202$ ,  $wR2 = 0.0547$  and  $GOF = 1.039$  for 2030 reflections (115 parameters) with  $I > 2\sigma(I)$ ,  $R1 = 0.0212$ ,  $wR2 = 0.0554$  and  $GOF = 1.039$  for all reflections, max/min residual electron density  $+0.490/-0.222$  eÅ<sup>3</sup>, CCDC: 741266.

*Mass Spectroscopy Experiments.* Laser Desorption Ionization experiments on  $H_2L^b$  with  $AsCl_3$  where performed on a Waters Micromass Q-TOF MALDI mass spectrometer (Milford, MA USA) using V-Optics and positive ionization mode. Samples were prepared by spotting NMR solutions ( $CDCl_3$ ) containing the analyte directly onto the sample plate, without the use of a matrix, at various time intervals ranging from  $T=0$  to  $T=2$  hrs after the addition of  $AsCl_3$ . Initial spectra were nearly devoid of macrocycle **4<sup>b</sup>** and contained mostly  $M_nL_m$  species. After sampling at  $T=30$  minutes, macrocycle **4<sup>b</sup>** was the prominent species detected. Sodium adducts of the species of interest most likely resulted as the direct laser desorption technique. Additionally, multiply protonated thiols  $(M+2H+Na)^+$  were observed for species containing single thiols while  $(M+4H+Na)^+$  were observed for those containing two thiols.<sup>2</sup> Ligands capped with arsenic (no free thiols) flew as  $(M+Na)^+$  and did not contain additional protons.

*X-ray Crystallography.* Diffraction intensities for  $As_2L^cCl_4$  were collected at 173 K on a Bruker Apex diffractometer using  $MoK\alpha$  radiation  $\lambda = 0.71073$  Å. Crystals of  $As_2(L^b)_2Cl_2$  crack at low temperatures, so X-ray diffraction data for this compound was collected at room temperature, 293 K. Space groups were determined based on systematic absences ( $As_2L^cCl_4$ ) and intensity statistics ( $As_2(L^b)_2Cl_2$ ). Absorption corrections were applied by SADABS. Structures were solved by direct methods and standard Fourier techniques and refined on  $F^2$  using full matrix least-squares procedures. Non-H atoms were refined with anisotropic thermal parameters. H atoms in  $As_2L^cCl_4$  were found on the F-map and refined with isotropic thermal parameters. H atoms in  $As_2(L^b)_2Cl_2$  were refined in calculated positions in a rigid group model. All calculations were performed by the Bruker SHELXTL package. Single crystal X-ray diffraction studies were performed on a Bruker SMART APEX diffractometer.

## References:

- 1)  $H_2L^a$ : P. Zhang and D. R. Bundle, *Isr. J. Chem.* **2000**, *40*, 189-208.  
 $H_2L^b$ : W. D. Rohrbach and V. Boekelheide, *J. Org. Chem.* **1983**, *48*, 3673-3678.  
 $H_2L^c$ : V. M. Cangelosi, L. N. Zakharov, S. A. Fontenot, M. A. Pitt and D. W. Johnson, *Dalton Trans.* **2008**, 3447.
- 2) R. Zenobi and R. Knochenmuss, *Mass Spectrom. Rev.* **1998**, *17*, 337.

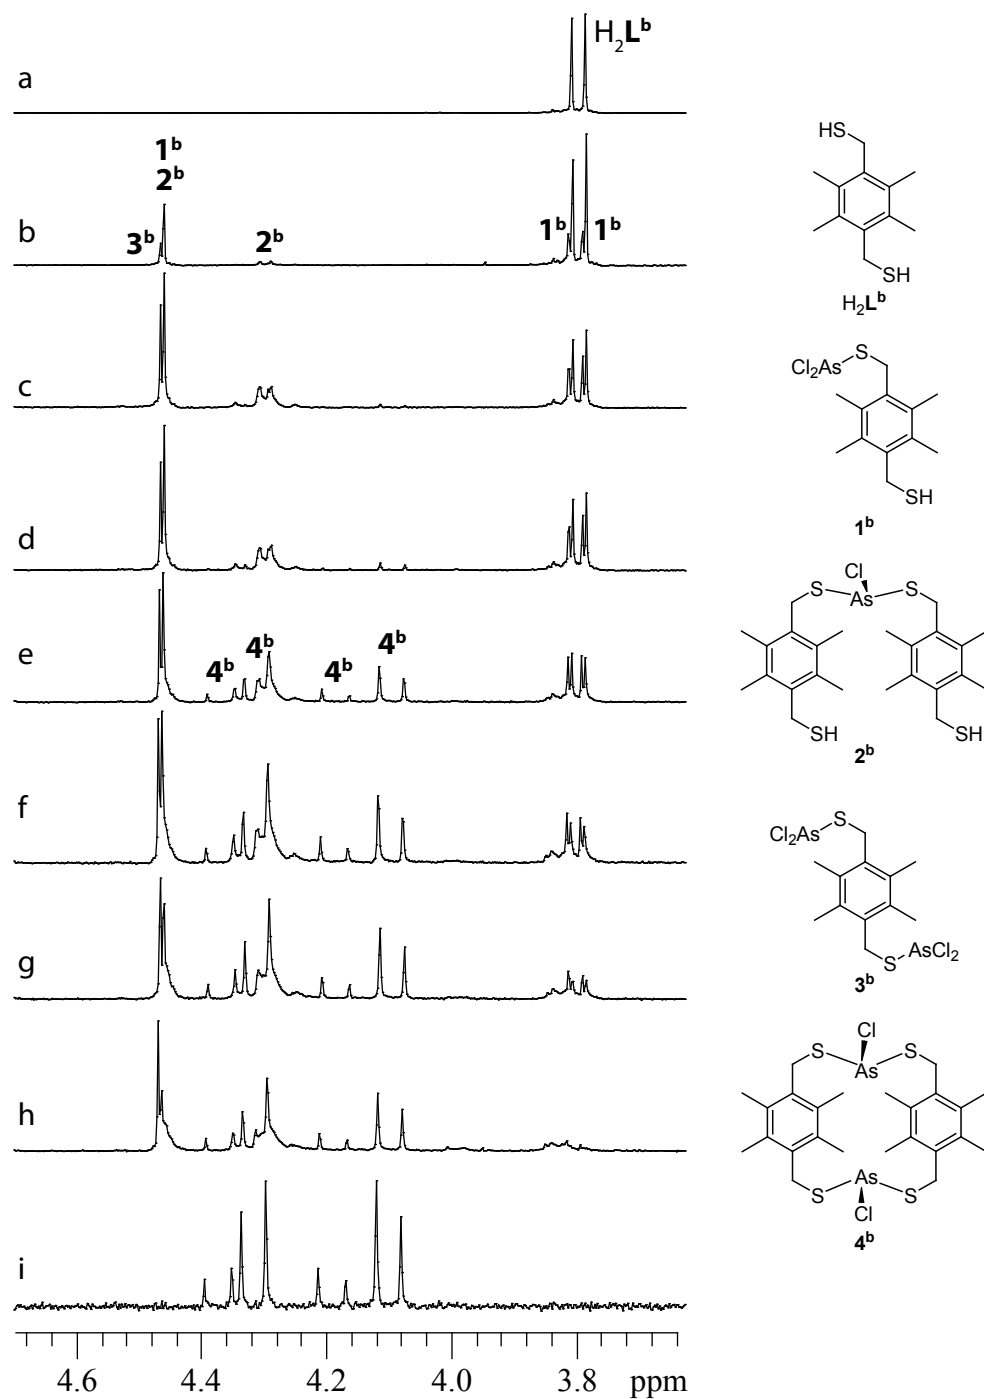

**Figure S1.** CH<sub>2</sub> region of <sup>1</sup>H NMR spectra of reaction of H<sub>2</sub>L<sup>b</sup> with AsCl<sub>3</sub> after a) 0, b) 4, c) 75, d) 147, e) 1559, f) 2666, g) 3995, and h) 8395 minutes and dissolved crystals of As<sub>2</sub>L<sub>2</sub>Cl<sub>2</sub> (4<sup>b</sup>).

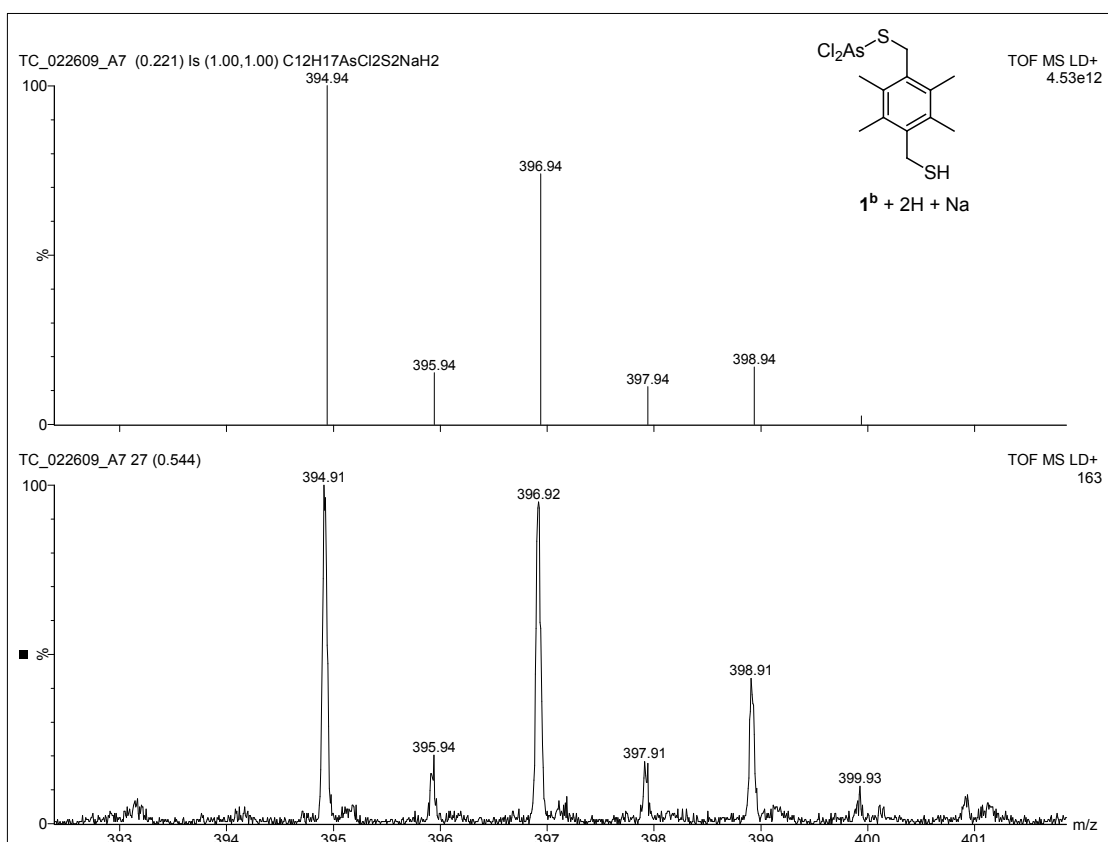

**Figure S2.** MALDI mass spectrometry data for **1<sup>b</sup>**. Predicted data shown on top and actual data shown on the bottom.

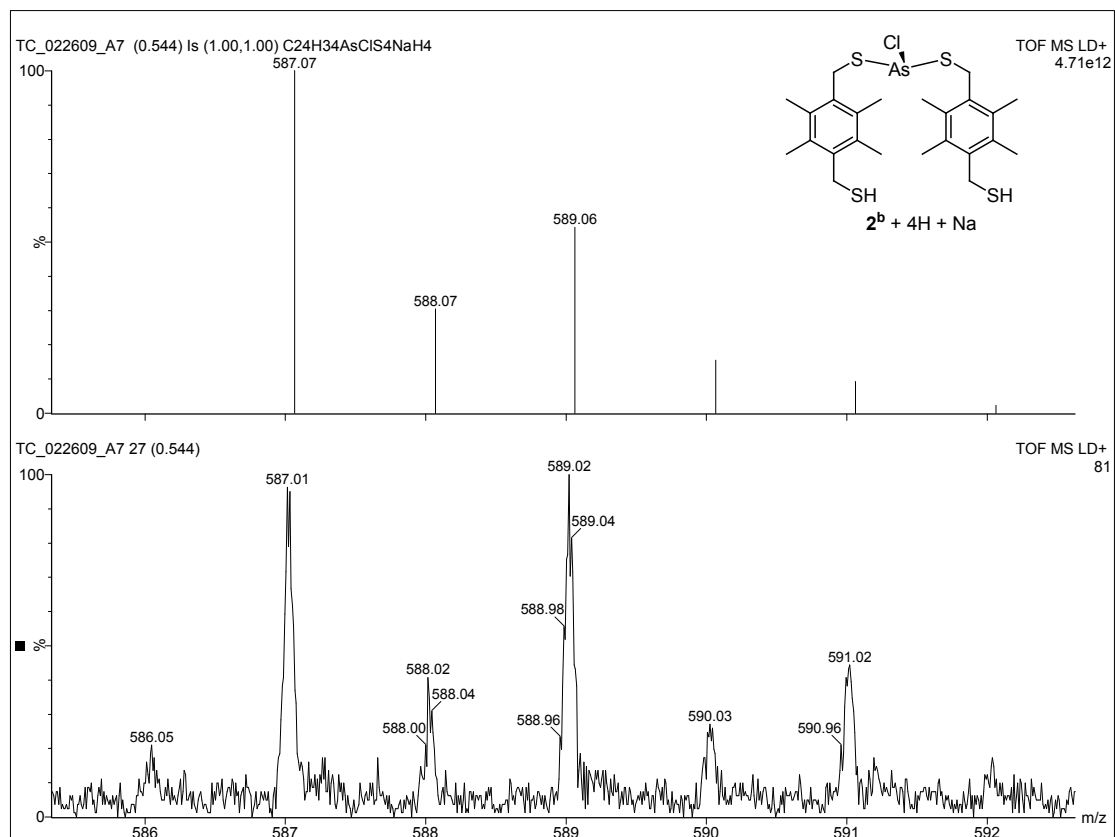

**Figure S3.** MALDI mass spectrometry data for **2<sup>b</sup>**. Predicted data shown on top and actual data shown on the bottom.

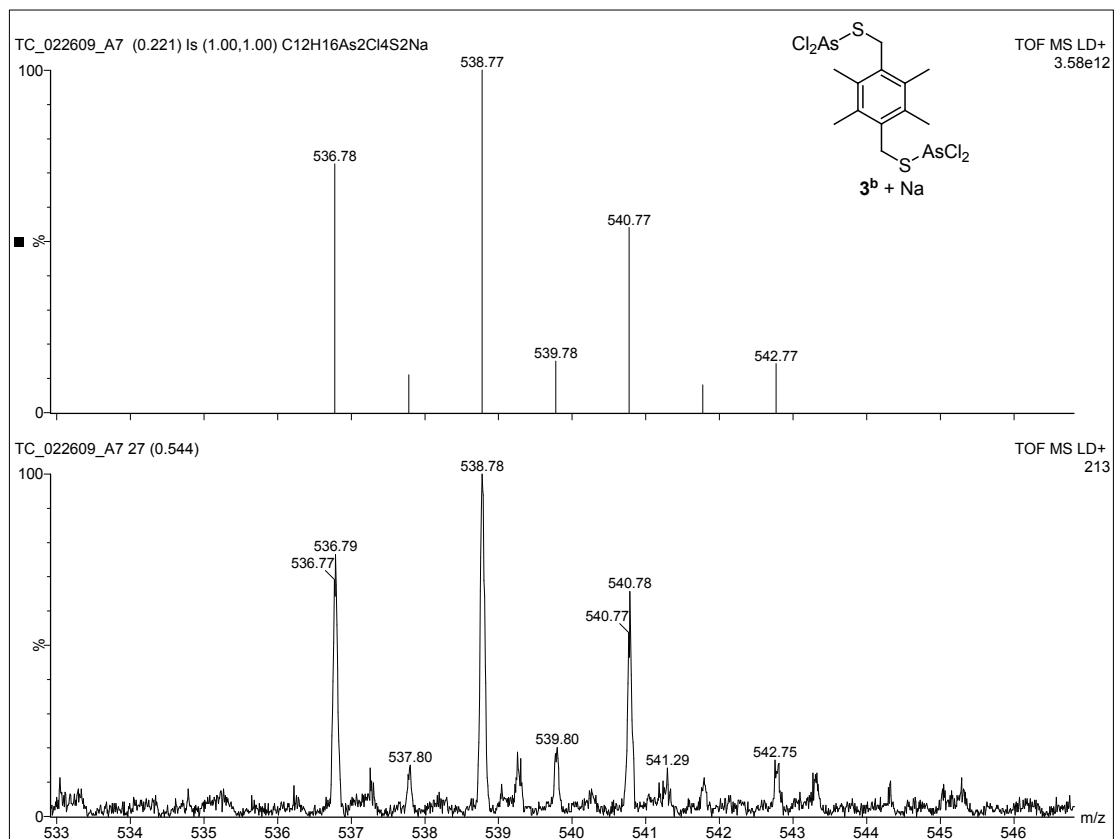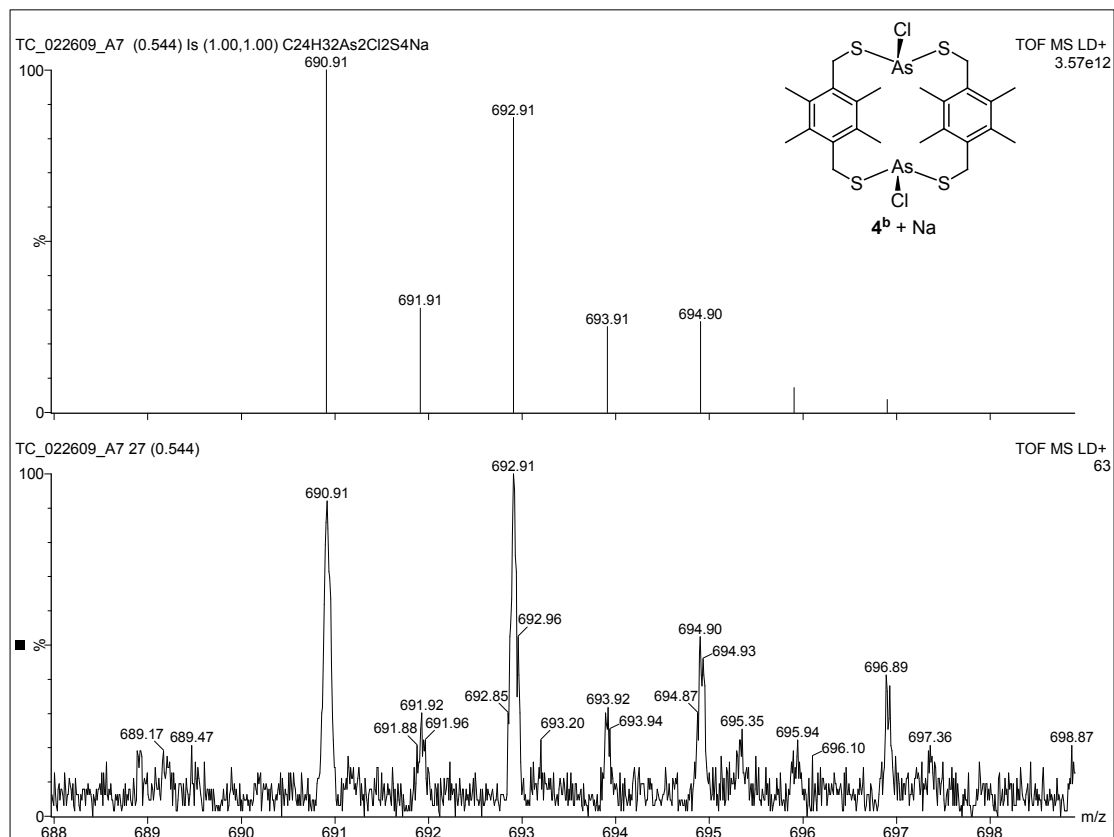

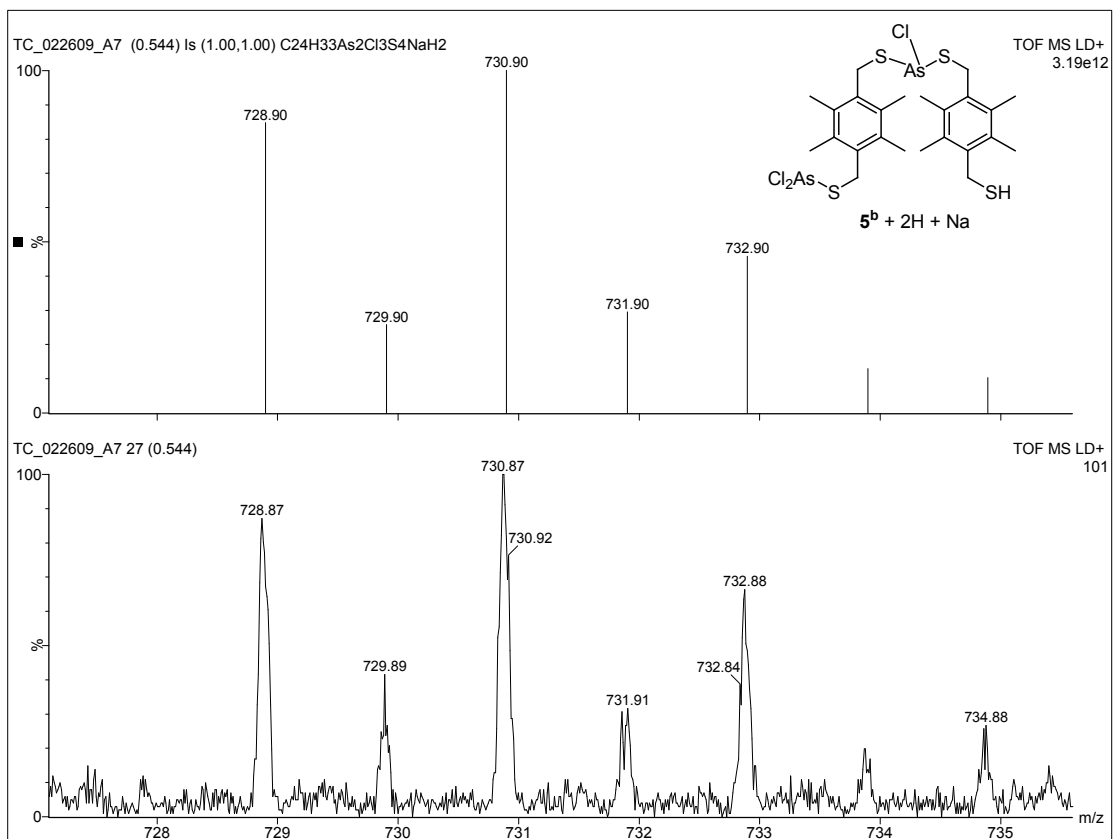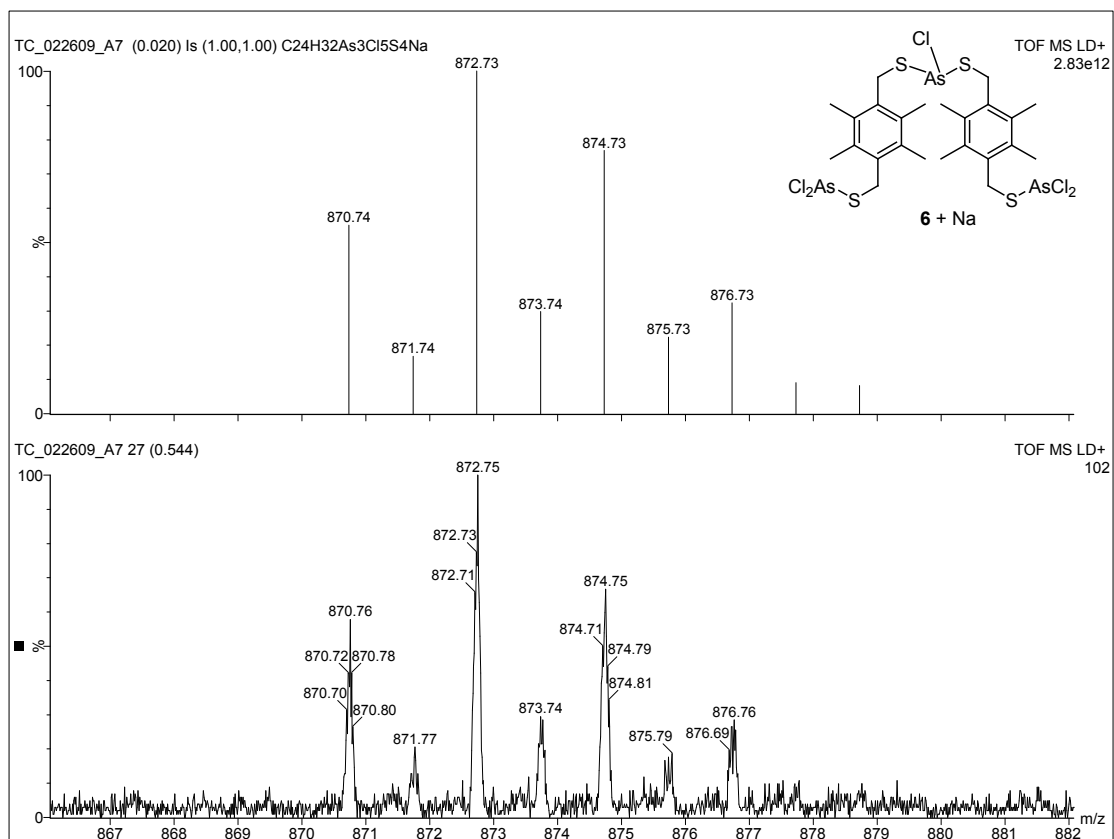

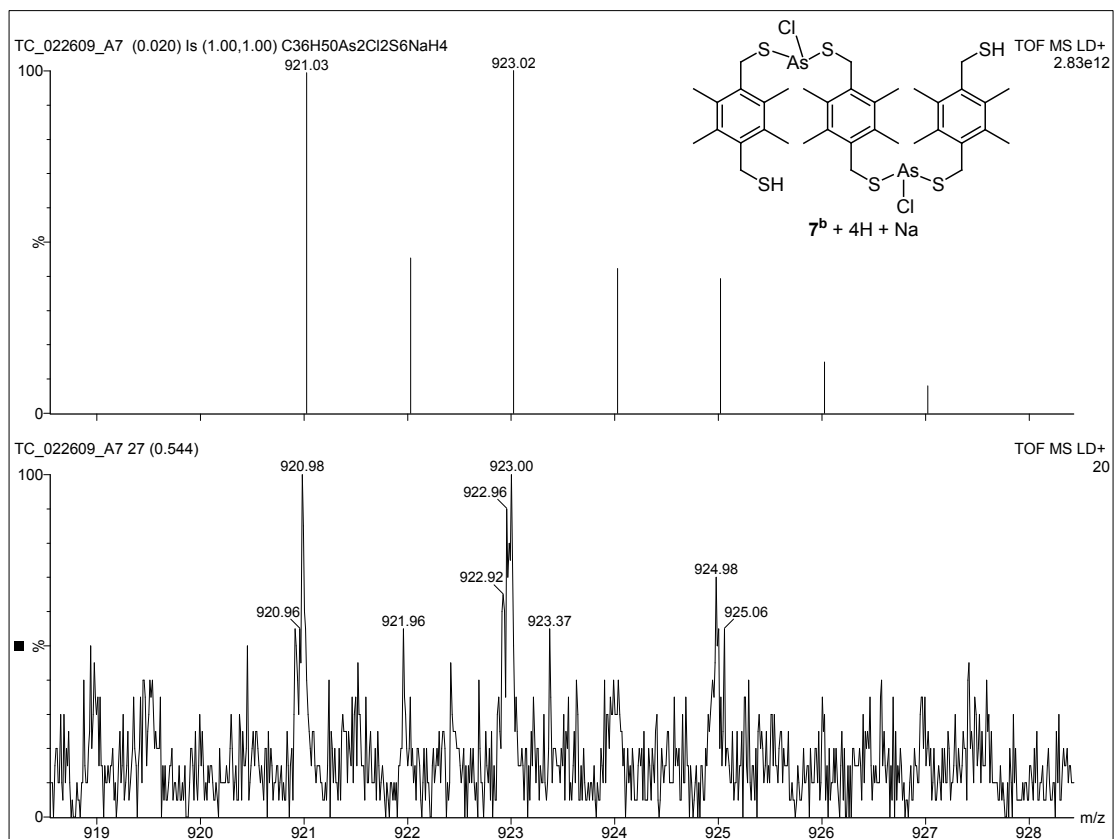

**Figure S8.** MALDI mass spectroscopy data for **7<sup>b</sup>**. Predicted data shown on top and actual data shown on the bottom.

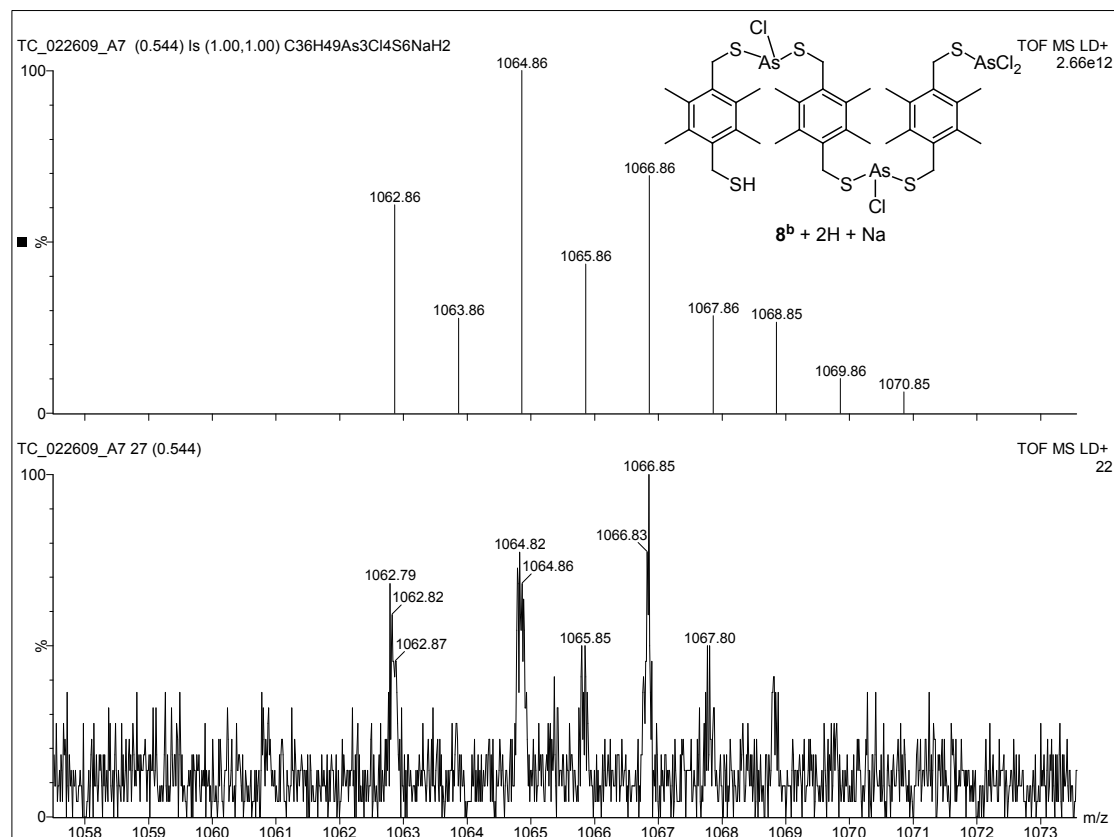

**Figure S9.** MALDI mass spectroscopy data for **8<sup>b</sup>**. Predicted data shown on top and actual data shown on the bottom.

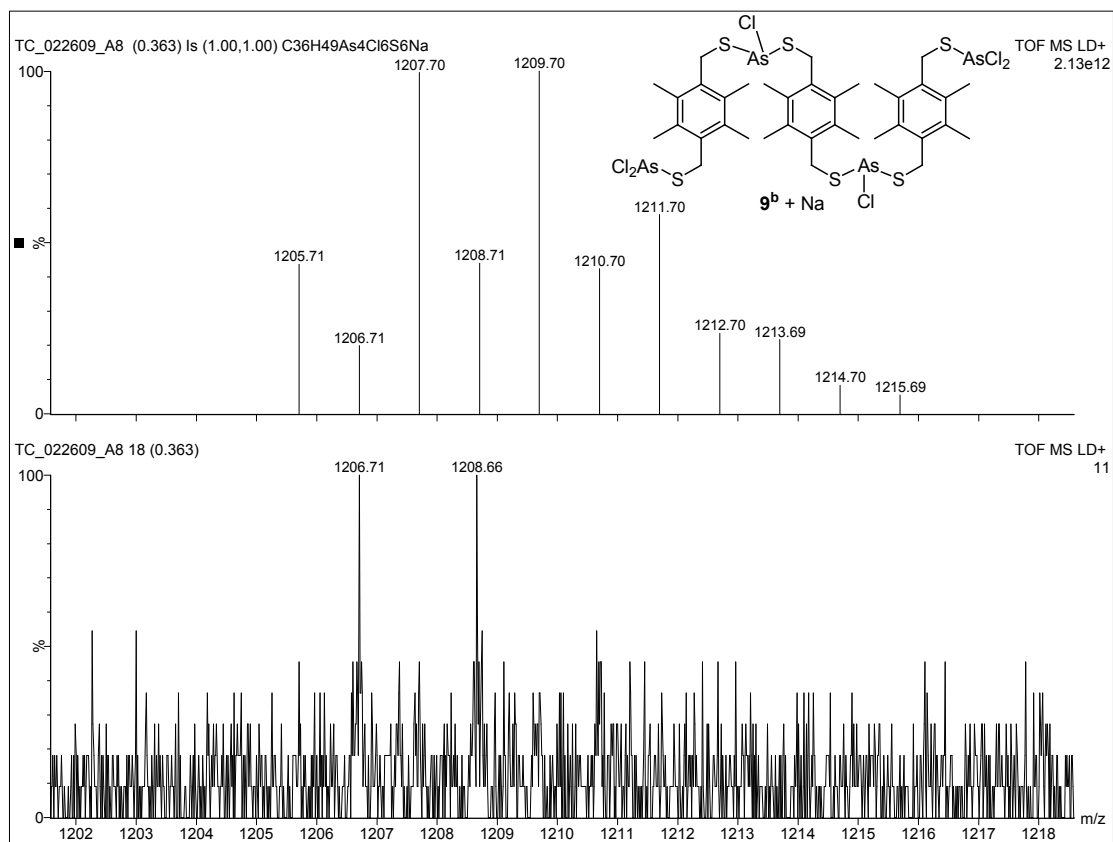

**Figure S10.** MALDI mass spectroscopy data for **9<sup>b</sup>**. Predicted data shown on top and actual data shown on the bottom.
